# The magnitude, determinants, and outcome of shock among pediatric patients: A cross-sectional hospital-based study.

Mebrahtu G. Kidanu<sup>1</sup>, Engdaeshet Tazebe<sup>2</sup>, Alemseged Birhane<sup>3</sup>, Marta Yemane<sup>4</sup>,  
Mebrihit M. Kaysay<sup>5</sup>, Mebrahtu G. Tedla<sup>6</sup>

<sup>1</sup>Aksum University, College of Health Science, School of Medicine, Department of Pediatrics and Child health, Aksum, Ethiopia; <sup>2,3,4</sup>Mekelle University, College of Health Science, School of Medicine, Department of Pediatrics and Child Health, Mekelle, Ethiopia; <sup>5</sup>College of Health Sciences, School of Medicine, Addis Ababa University, Addis Ababa, Ethiopia. <sup>6</sup>Child Health Research Institute, School of Medicine, University of Missouri-Columbia, Columbia, MO, 65211, USA

\*Corresponding author:

Mebrahtu G. Tedla: Department of Child Health, School of Medicine, University of Missouri-Columbia, Columbia, MO, 65211, USA:

Address for correspondence: [mtmpx@health.missouri.edu](mailto:mtmpx@health.missouri.edu)

## 2 **Abstract**

3 **Background:** Pediatric shock, a potentially fatal illness, develops after a systemic  
4 circulatory system failure. It appears to be a common emergency in children and produces  
5 substantial morbidity and mortality particularly if there is no early identification and  
6 therapy. The extent and causes of shock-induced death among children in Ethiopia have  
7 not been sufficiently studied.

8 **Objective:** This study was conducted to evaluate the severity, determinants, and  
9 prognosis of shock in pediatric patients who visited Ayder Comprehensive Specialized  
10 Hospital in Tigray, Northern Ethiopia.

11 **Methods:** From October 1st, 2020, to July 30th, 2022, an observational cross-sectional  
12 study was carried out at Ayder Comprehensive Specialized Hospital. The study included  
13 132 children from the age of 1 month to 18 years. According to pediatric advanced life  
14 support guidelines, shock was diagnosed among patients. To gather information, a  
15 pretested questionnaire was employed. To examine the relationship between the  
16 independent variables and shock outcome, bivariate logistic regression was performed,  
17 and statistical significance was defined as a P-value of 0.05 or lower.

18 **Result:** The prevalence of shock was 2.2%. This study revealed 70.4 % decompensated  
19 stage of shock. Mortality rate of shock was 45.5% (95% CI: 37.1-53.8). A delayed  
20 presentation by more than one week with an adjusted odd ratio(AOR) of 16.9 (95%  
21 CI:2.3-123), type of shock other than hypovolemic shock with AOR of 8.3 (95% CI: 1.4-  
22 48), stage of shock with AOR of 27.8 (95% CI: 2.8-157), requirement of mechanical  
23 ventilation with AOR of 11 (95% CI:2.6-53) and length of hospital stay less than three

24 days with AOR of 9 (95% CI: 1.7-48) were identified as a predictor of mortality by shock  
25 in children.

26 **Conclusion:** According to this study, shock causes a higher rate of child mortality.  
27 Independent predictors of mortality included delayed presentation, shock type, shock  
28 stage, need for mechanical ventilation, and brief hospital stay (less than three days).

29 **Key words:** shock, children, prevalence, outcome, magnitude, cross-sectional study,  
30 Ayder Hospital.

31

## 32 **Background**

33

34 The body's incapacity to supply enough oxygen to meet the metabolic needs of essential  
35 organs and tissues causes an acute state of shock. Adverse vascular, inflammatory,  
36 metabolic, cellular, endocrine, and systemic responses exacerbate physiologic instability  
37 if insufficient tissue perfusion continues [1]. Hypovolemic, distributive, cardiogenic,  
38 obstructive, and dissociative types are five broad classifications of shock [1,2]. Intensive  
39 treatment must be started quickly to manage shock in children. Most pediatric hospital  
40 deaths frequently happen within the first 24 hours of admission. Early goal-directed  
41 therapy for shock aimed at improving vital organ function and physiologic indications of  
42 perfusion within the first six hours of treatment, combined with an aggressive, systematic  
43 strategy to resuscitation [3]. Multiple organ system failure is the primary complication of  
44 shock and is linked to a higher death rate and longer hospital stays in survivors [1, 2].

45

46 In developed countries, shock is thought to affect 2% of all hospitalized patients, and the  
47 death rate varies according to the type of shock and clinical circumstances [1]. However,  
48 shock in children is associated with a high morbidity and mortality rate in low- and middle-  
49 income countries, with prevalence ranging from 1.5 to 44.3% and mortality from 3.9 to  
50 33.3%. Most deaths happen during the first 24 hours of admission, and most of them are  
51 avoidable [4].

52

53 Preliminary studies and reports from hospitals in Ethiopia showed that there is high  
54 prevalence of shock and is associated with high mortality. For example, a cross-sectional  
55 study on admitted and outcome patients of children at a hospital located in South-Western  
56 Ethiopia showed shock in children was the leading medical cases which accounts for 17%  
57 of the admissions and a high mortality rate of up to 50% [5]. There is paucity of data on  
58 short term outcome of shock in children in Ethiopia, in particular in our study area.  
59 Therefore, this study was conducted to assess the magnitude of pediatric shock and to  
60 identify the factors associated with mortality among children visited to pediatric  
61 emergency outpatient unit of the hospital.

62

## 63 **2 Methods and Materials**

64

### 65 **Study area**

66

67 Ayder Comprehensive Specialized Hospital is a referral and teaching hospital found in  
68 Ethiopia's Tigray region, Mekelle and this study was conducted from October 1, 2020, to  
69 July 30, 2022.

70

### 71 **Study design**

72

73 Institution based cross-section study was conducted and patients aged between 1 month  
74 to 18 years and who have visited to the hospital, department of pediatrics and child health.

75

76 **Inclusion and exclusion criteria**

77

78 Children from the age of 1 month up to 18 years old teenagers were included in the study.

79 Patients or guardians who received medical advice were included in the study. Whereas

80 those who didn't receive medical advice were excluded from the study.

81

82 **Sample size determination and sampling procedure**

83

84 The sample size was determined using a single population proportion formula with a 95%

85 confidence level, 5% margin of error as follows:  $n = \frac{(Z)^2 \times P(1-p)}{(d)^2} = (1.96)^2 \times$

86  $0.09(1-0.09) \div (0.05)^2 = 126$  ; where: **n**: is the minimum sample size required; **p**:

87 prevalence of shock in children ; **Z**: is the standard normal variable at (1- $\alpha$ ) % confidence

88 level and  $\alpha$  is mostly 0.05 i.e. with 95% CI ( $z=1.96$ ); **d**: is the margin of error to be tolerated

89 (5%);  $n = 139(10\%)$ .

## 91 **Data collection tools and procedures**

92

93 A semi-structured questionnaire that had been pre-tested was used to gather data. After  
94 being translated into Tigrigna, the local language, the questionnaire was pretested in  
95 English. Based on the PALS criteria, information was gathered from every child who had  
96 been diagnosed with shock. Age-specific ranges were used to interpret investigations and  
97 vital signs, and the WHO curve was also used to interpret anthropometry results. The use  
98 of pretested questioners helped to ensure the accuracy of the data. Ten patients who  
99 were enrolled in the study were given a pretest version of the questionnaire, and the  
100 language's clarity was examined. Each questionnaire was examined by the lead  
101 investigator prior to data entry.

102

## 103 **Data processing and analysis**

104

105 Data were first verified and coded before being put into Epi Data Manager version 4.6.0.2.  
106 From there, they were exported to the Statistical Package and Service Solution (SPSS)  
107 version 23 for analysis. Frequency and percentages were used to express category  
108 variables. After being verified to have a normal distribution, those continuous variables  
109 were expressed as the mean plus standard deviation and median. First, bivariate logistic  
110 regression analysis was used to evaluate the factors that influence the short-term  
111 outcome of shock in children.

113

### 114 **Ethical approval and consent to participate.**

115

116 The Institutional Review Board (IRB) of Mekelle University's College of Health Sciences  
117 granted ethical approval (MU-IRB 1998/2022: ethical approval number). Consent was  
118 obtained from all guardians of study participants, both verbally and in writing. All  
119 guardians of study participants received information on the purpose of the study, its  
120 contents, and their interest to decline or stop participating in the study at any time.

121

### 122 **3. Result**

123

124 Out of a total 6112 visits to the Pediatric Emergency Outpatient Department (PEOPD), 134  
125 participants were diagnosed with shock, and this gives a point prevalence 2.2%. The  
126 Socio-demographic characteristics of study participants and caregivers were also analyzed, and  
127 the median age of the study participants was 6.45 years. Thirty-seven (28%) were infants,  
128 38(28.8%) were between the age of 1 and 5 years and 57(43.2%) were above 5 years  
129 old. The male to female ratio was 1.3: 1. More than half (55.3%) of the participants were  
130 from urban area, 30 (22.7%) of attendants were not educated and 88 (66.7%) of the  
131 participants were referred from other facility (Table 1).

132

133

134 **Table 1:** Socio-demographic characteristics of study participants and caregivers among  
135 pediatric shock patients



| Variables                                  | Category            | Count(n) | Percentage (%) |
|--------------------------------------------|---------------------|----------|----------------|
| <b>Sex of the children</b>                 | Male                | 75       | 56.8%          |
|                                            | Female              | 57       | 43.2%          |
| <b>Residence</b>                           | Urban               | 73       | 55.3%          |
|                                            | Rural               | 59       | 44.7%          |
| <b>Age of participant</b>                  | 1month-11 month     | 37       | 28%            |
|                                            | 1-5 years           | 38       | 28.8%          |
|                                            | Above 5 years       | 57       | 43.2%          |
| <b>Mothers' educational status</b>         | No formal education | 30       | 22.7%          |
|                                            | Primary             | 52       | 39.3%          |
|                                            | Secondary           | 36       | 27.4%          |
|                                            | Tertiary            | 14       | 10.6%          |
| <b>Referred from other health facility</b> | Yes                 | 88       | 66.7%          |
|                                            | No                  | 44       | 33.3%          |

136

### 137 **3.1. Clinical profile and laboratory result of participants**

138

139 Among the patients included in the study, the most common symptom was  
 140 vomiting;103(78%), followed by altered mentation;91 (68.9%), fast breathing; 88(66.7%),  
 141 fever; 80(60.6%), diarrhea ;76(57.6%). A total of 72(54.4%) of them were presented after  
 142 one week of illness, 34(25.8%) were presented within two days of illness. From the total  
 143 of 132 cases, one third (31.8%) of them had chronic medical illness. Those include  
 144 cardiac 12(28.6%), hematologic disease 11(26.2%), diabetes mellitus 9(21.4%), epilepsy  
 145 7(16.7%), respiratory viral infection 2(4.8%) and 1(2.3%) with brain tumor. The most  
 146 common clinical sign noticed was tachycardia 115(87.1%), feeble pulse volume  
 147 111(84.1%), positive sign of dehydration 98(74.2%), tachypnea 94(71.2%), saturation  
 148 below 90% in 88(66.7%), decrease urine output in 84 (63.4%), pallor in 68(51.5%). Blood  
 149 pressure measurement was taken for 58(43.9%) and it was unrecordable in more than

150 20(35.1%) of them. Nutritional assessment showed that severe wasting was noticed in  
 151 55(41.7%) of the total. Mean Glasgow coma scale (GCS) of participants was 12.5  
 152 (SD±2.6) and nineteen (14.4%) patients were comatose at presentation (Table2).

153

154 **Table 2:** Physical finding and measurements of pediatric shock patients

155

| Variables              | Category      | Count (%)  | Variables                  | Category      | Count (%)  |
|------------------------|---------------|------------|----------------------------|---------------|------------|
| <b>PR</b>              | Tachycardia   | 115(87.1%) | <b>W/L</b>                 | Normal        | 28(21.1)   |
|                        | Normal        | 15(11.4%)  |                            | -2&-3 Z score | 53(40.2%)  |
| <b>RR</b>              | Bradycardia   | 2(1.5%)    | <b>Sign of dehydration</b> | <3 Z score    | 51(41.7%)  |
|                        | Normal        | 32(24.2%)  |                            | Yes           | 98(74.2%)  |
|                        | Tachypnea     | 94(71.2%)  |                            | No            | 34(25.8%)  |
| <b>SPO<sub>2</sub></b> | Bradypnea     | 6(4.5%)    | <b>Pulse volume</b>        | Normal        | 5(3.8%)    |
|                        | <90%          | 88(66.7%)  |                            | Feeble        | 111(84.1%) |
| <b>BP</b>              | 91%and above  | 44(33.3%)  | <b>Capillary refill</b>    | Bounding      | 16(12.1%)  |
|                        | Not measured  | 75(56.8%)  |                            | <3 Second     | 15(11.45%) |
|                        | Un recordable | 20(15.2%)  |                            | 3-5 Second    | 93(70.5%)  |
| <b>TO</b>              | Hypotensive   | 33(25%)    | <b>UOP</b>                 | >5 Second     | 24(18.2%)  |
|                        | Normotensive  | 4(3%)      |                            | Normal        | 34(25.8%)  |
|                        | hypothermic   | 50(37.9%)  |                            | Oliguria      | 84(63.6%)  |
| <b>MUAC</b>            | Febrile       | 49(37.1%)  | <b>GCS</b>                 | Polyuria      | 14(10.6%)  |
|                        | Normal        | 33(25%)    |                            | 15            | 13(9.8%)   |
|                        | Normal        | 32(24.2%)  |                            | 14-9          | 100(75.8%) |
| <b>MUAC</b>            | -2&-3Z score  | 45(34.1%)  | <b>RBS</b>                 | 3-8           | 19(14.4%)  |
|                        | <-3 Z score   | 55(41.7%)  |                            | Normal        | 77(58.3%)  |
|                        |               |            |                            | Hypoglycemia  | 40(30.3%)  |
|                        |               |            | Hyperglycemia              | 15(11.4%)     |            |

156

157

158

159 A complete blood count was done for 87(65.9%) of the cases. Hemoglobin blood test  
 160 was performed in 93(70.5%) cases and the result showed 57(61.3%) of them had low  
 161 hemoglobin level. Creatinine level test in 94(71.2%) cases showed an elevation in more  
 162 than half 54(57.4%) of them. Liver function test (LFT) was performed for only one-third  
 163 participants, and it was elevated in nearly half of them. Serum electrolyte (sodium and

164 potassium) test was also performed in less than two third (64.4%) of participants but only  
 165 eleven participants had serum calcium determination and nine of them showed  
 166 hypocalcemia (Table 3). Electrolyte abnormality and stage of shock pediatric patient was  
 167 also assessed (Table 4).

168 **Table 3:** Laboratory parameters of pediatric shock patients  
 169

| <b>Variables</b>  | <b>(n)</b> | <b>Category</b>  | <b>Count (N)</b> | <b>Percentage</b> |
|-------------------|------------|------------------|------------------|-------------------|
| <b>CBC</b>        | 87(66%)    |                  |                  |                   |
| <b>WBC</b>        |            | Leukocytosis     | 44               | 50.6%             |
|                   |            | Normal           | 30               | 34.7%             |
|                   |            | Leukopenia       | 13               | 14.9%             |
| <b>Hemoglobin</b> |            | Normal           | 32               | 36.8%             |
|                   |            | Anemia           | 55               | 63.2%             |
| <b>PLT</b>        |            | Thrombocytosis   | 19               | 21.8%             |
|                   |            | Normal           | 33               | 37.9%             |
|                   |            | Thrombocytopenia | 35               | 40.2%             |
| <b>Cr</b>         | 94 (71,2%) | Normal           | 40               | 42.6%             |
|                   |            | Elevated         | 54               | 57.4%             |
| <b>LFT</b>        | 42 (31.8%) | Normal           | 23               | 54.8%             |
|                   |            | Elevated         | 19               | 45.2%             |
| <b>Na</b>         | 85 (64.4%) | Hypernatremia    | 26               | 30.6%             |
|                   |            | Normal           | 30               | 35.3%             |
|                   |            | Hyponatremia     | 29               | 34.1%             |
| <b>Ka</b>         | 85(64.4%)  | Hyperkalemia     | 23               | 27%               |
|                   |            | Normal           | 28               | 33%               |
|                   |            | Hypokalemia      | 34               | 40%               |
| <b>Ca</b>         | 11(8.3%)   | Normal           | 2                | 18.2%             |
|                   |            | Hypocalcemia     | 9                | 81.8%             |

170

172 **Table 4:** Electrolyte abnormality and stage of shock of pediatric patient

| Variables     | Compensated |      | Decompensated |      |
|---------------|-------------|------|---------------|------|
|               | Count(n)    | %    | Count(n)      | %    |
| Hypernatremia | 6           | 23.1 | 20            | 76.9 |
| Hyponatremia  | 13          | 44.8 | 16            | 55.2 |
| hyperkalemia  | 8           | 34.8 | 15            | 65.2 |
| Hypokalemia   | 13          | 38.2 | 21            | 61.8 |
| Hypocalcemia  | 3           | 33.3 | 6             | 66.7 |

173

174

### 175 **3.2. Type, Stage and Management of shock**

176 The most common type of shock was hypovolemic shock (53%), followed by septic shock  
177 (34.4%), mixed (6.8%), cardiogenic and anaphylactic shock each account for 2.3%  
178 respectively. Only one patient presented with obstructive shock. Out of the total 132  
179 cases,93(70.5%) of them were in decompensated stage. 44(33.3%) of participants had  
180 multiorgan failure. During the management of shock, 76(57.6%) patients received  
181 crystalloid boluses and 56(42.4%) cases were given both crystalloid and colloids. Out of  
182 the 60(45.5%) cases who required inotropic, 61.7% of them took both dopamine and  
183 adrenalin, 18(30%) dopamine only and 5(8.3%) adrenalin only, 37.9% of participants  
184 received steroid. 35.6% of the cases required mechanical ventilation. The time gap for  
185 the initiation of fluid after the patient arrived was determined and the mean duration was  
186  $24\pm 10$  minutes. The frequency of re-evaluation was every median of 1hr. The median  
187 length of hospital stay was 7 (Table 5 and Figure 2).

188

189

190

191

192

193

194

195 **Table 5:** Type, stage and management of pediatric shock patients

196

| Variables                        | Characteristics          | Count(n) | Percentage |
|----------------------------------|--------------------------|----------|------------|
| Type of shock                    | Hypovolemic              | 70       | 53%        |
|                                  | Septic                   | 46       | 34.8%      |
|                                  | Mixed                    | 9        | 6.8%       |
|                                  | Cardiogenic              | 3        | 2.3%       |
|                                  | Anaphylactic             | 3        | 2.3%       |
|                                  | Obstructive              | 1        | 0.8%       |
| Stage of shock                   | Compensated              | 39       | 29.5%      |
|                                  | Decompensated            | 93       | 70.5%      |
| Multi organ dysfunction syndrome | Yes                      | 44       | 33.3%      |
|                                  | No                       | 88       | 66.7%      |
| Fluids administration            | Crystalloids only        | 76       | 57.6%      |
|                                  | Crystalloids and colloid | 56       | 42.4%      |
| Antibiotic administration        | Started just on arrival  | 45       | 35.2%      |
|                                  | He/she was on antibiotic | 83       | 64.8%      |
| Inotropic administration         | Yes                      | 60       | 45.5%      |
|                                  | No                       | 72       | 54.5%      |
| Steroid administration           | Yes                      | 50       | 37.9%      |
|                                  | No                       | 82       | 62.1%      |
| Invasive ventilation provided    | Yes                      | 47       | 35.6%      |
|                                  | No                       | 85       | 64.4%      |
| Patient outcome                  | Improved                 | 72       | 54.5%      |
|                                  | Dead                     | 60       | 45.5%      |

197

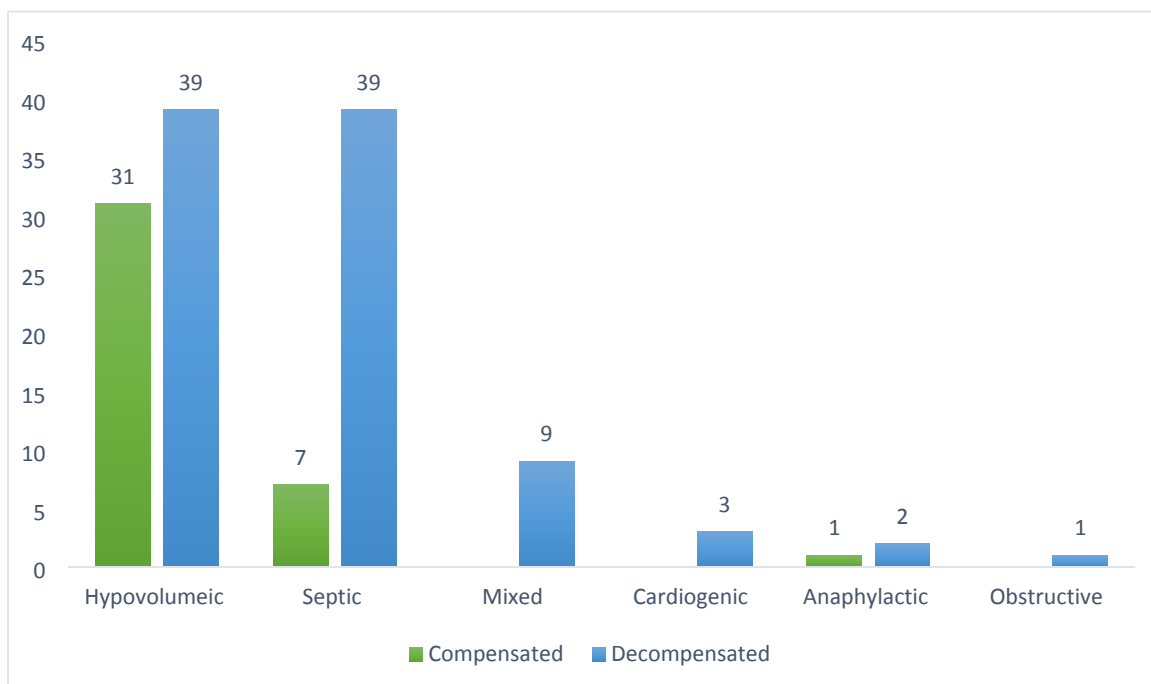

198

199

200

**Figure 1: Type and stage of shock children**

201  
202  
203  
204  
205  
206  
207  
208  
209  
210  
211  
212

### 3.3. Outcome of shock in pediatric patient

The overall mortality of shock in this study was 45.5% (95% CI ,37.1-53.8). Out of those, 64.5% were in decompensated stage of shock. The proportion of death was higher in those above five years old (43.3%) followed by infants (30%) and 26.7% in 1-5 years old. But the case fatality rate was higher among those infants (48.6%), followed in those above five years 45.6% and 42.1% in 1-5 years. 70% of death were referred from other health facility. Mortality of mixed type cardiogenic and obstructive type of shock were 100%. Case fatality rate of septic shock was 65.2% and 21.4% for hypovolemic shock. 50% of mortality was due to septic shock (Figure 2).

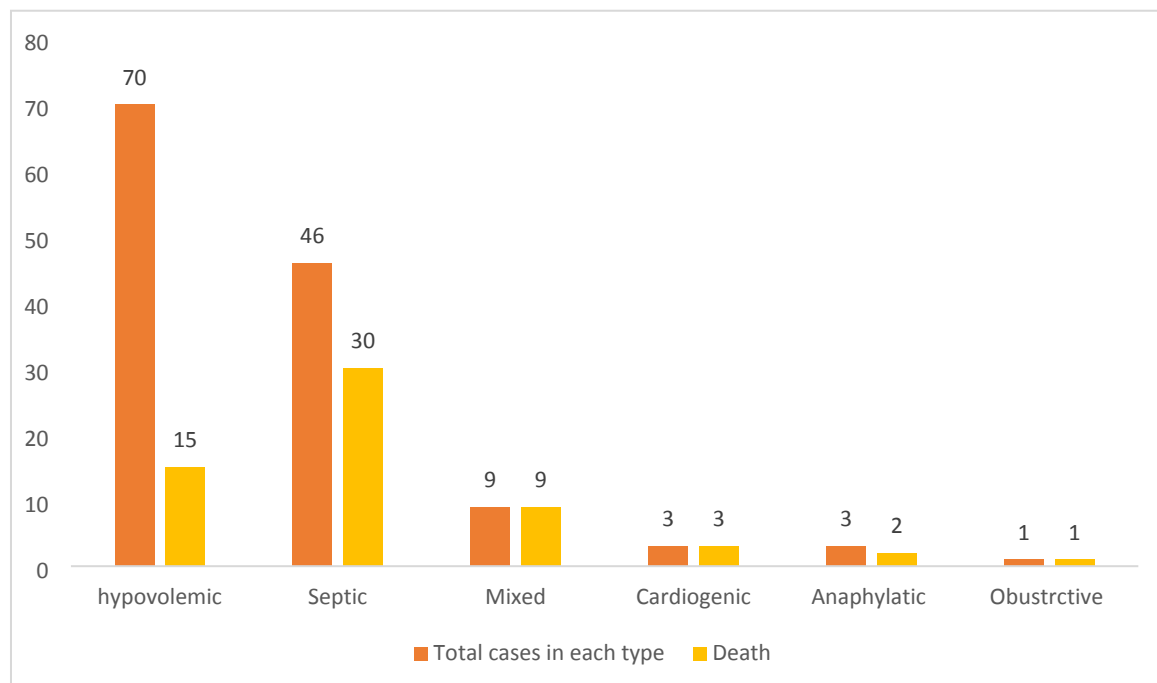

213  
214 **Figure 2: Type versus outcome of pediatric shock patients**

215  
216

217

### 218 3.4. Predictors of mortality shock among pediatric patients

219

220 A binary logistic regression analysis was performed to identify independent predictor or  
 221 causes of mortality by shock among pediatric patients(Table 6) and our result revealed  
 222 delayed presentation by more than one week with an adjusted odd ratio(AOR) of 16.9  
 223 (95% CI:2.3-123), type of shock other than hypovolemic shock with AOR of 8.3 (95% CI:  
 224 1.4-48), stage of shock with AOR of 27.8 (95% CI: 2.8-157), requirement of mechanical  
 225 ventilation with AOR of 11 (95% CI:2.6-53) and length of hospital stay less than three  
 226 days with AOR of 9 (95% CI: 1.7-48).

227

228 Table 6: Assessing predictors of mortality among pediatric shock patient using binary  
 229 logistic regression.

| Variables                 |              | Outcome of shock |           | Odds ratio    |           |               |           |
|---------------------------|--------------|------------------|-----------|---------------|-----------|---------------|-----------|
|                           |              | Improved         | Died      | COR (95% CI)  | P - value | AOR (95% CI)  | P - value |
| Duration of illness       | 1-2days      | 26(76.5%)        | 8(23.5%)  | 1             |           | 1             |           |
|                           | 8 and above  | 27(37.5%)        | 45(62.5%) | 5.4(2.2-13.6) | <0.001    | 16.9(2.3-123) | 0.005     |
| Duration of hospital stay | 1-3 days     | 9(24.3%)         | 28(75.7%) | 5(2-13)       | <0.001    | 9(1.7-48)     | 0.008     |
|                           | Above 10days | 37(62.7%)        | 22(37.3%) | 1             |           | 1             |           |
| Underlying illness        | Yes          | 18(42.9%)        | 24(57.1%) | 2(0.9-4)      | 0.067     | .59(0.15-2.4) | 0.467     |
|                           | No           | 54(60%)          | 36(40%)   | 1             |           | 1             |           |
| Type of shock             | Hypovolemic  | 55(78.6%)        | 15(21%)   | 1             |           | 1             |           |
|                           | Others       | 17(27.4%)        | 45(72.6%) | 9.7(4.4-21.5) | <0.001    | 8.3(1.4-48)   | 0.02      |
| Stage of shock            | Compensated  | 37(94.9%)        | 2(5.1%)   | 1             |           | 1             |           |

|                               |               |           |             |               |        |               |       |
|-------------------------------|---------------|-----------|-------------|---------------|--------|---------------|-------|
|                               | Decompensated | 35(37.6%) | 58(62.4%)   | 30.6(6.9-135) | <0.001 | 27.8(2.8-157) | 0.003 |
| MODS                          | Yes           | 9(20.5%)  | 35(79.5%)   | 9.8(4.2-23.3) | <0.001 | 3(0.77-12)    | 0.110 |
|                               | No            | 63(71.6%) | 25(28.4%)   | 1             |        | 1             |       |
| Inotrope administration       | Yes           | 17(28.3%) | 43(71.1%)   | 8.2(3.7-17.8) | <0.001 | 0.00(00- )    | 1     |
|                               | No            | 55(76.4%) | 17(23.6%)   | 1             |        | 1             |       |
| Steroid                       | Yes           | 14(28%)   | 36(72%)     | 6.2(2.8-13)   | <0.001 | 1(0.11-8)     | 0.994 |
|                               | No            | 58(70.7%) | 24(29.3.0%) | 1             |        | 1             |       |
| Invasive ventilation provided | Yes           | 9(19.1%)  | 38(80.9%)   | 12(5-29)      | <0.001 | 11(2.6-53)    | 0.001 |
|                               | No            | 63(74.1%) | 22(25.9%)   | 1             |        | 1             |       |

230

## 231 Discussion

232 In this study, we have assessed and confirmed the magnitude and factors associated with  
 233 mortality of shock in children who visited Ayder Comprehensive Specialized Hospital. The  
 234 prevalence of shock was 2.2%. S similar studies on the prevalence of shock among all  
 235 hospitalized infants, children and adult has been reported in developed countries which  
 236 was 2% [1]. However, this prevalence is lower comparing to reports from another  
 237 countries; 4.3% [6]; 9% [7], and 2.8% [8]. In this study, the most common type of shock was  
 238 identified as hypovolemic shock (53%). Only one patient with obstructive shock with massive  
 239 pericardial and plural fluid was found. Our finding is supported by previous studies conducted  
 240 elsewhere who have shown the most common type of shock was hypovolemic shock that  
 241 accounted for 45.9% cases followed by septic type (34.6%), cardiogenic type (17.3%) and  
 242 distributed type (2%) [8]. However, previous studies showed prevalence based on type of shocks  
 243 as septic 28%, distributive 22%, septic(cardiogenic) type 17.5%, hypovolemic15.7%, and



244 cardiogenic shock 12% [7]. In our study there were 93(70.5 %) with decompensated stage of  
245 shock, which is higher than previous studies who 40 [8], and 57.9 % [7].

246

247 In this study those with mixed, cardiogenic and obstructive type of shock were all in  
248 decompensated stage of shock. The decompensation in hypovolemic and septic were  
249 55.7% (39/70) and 84.7 % (39/46) respectively. This could be because of the fact that  
250 66.7% (88) of children included in the study were referrals from another hospital, with  
251 associated delay in recognition or transfer to our hospital for better management. Of the  
252 42(31.8%) children who received liver function test, 19(45.2%) have elevated values, and  
253 13(68.4%) of them were from the decompensated category. Creatinine was done for  
254 94(71.2%) and was elevated in more than half 54(57.4%) of the patients, and of those  
255 with elevated creatinine, 38(70.4%) were in decompensated stage. Liver function tests  
256 were done only in less than one- third (31.8%) of participants and renal function tests  
257 were done in only 71.2% participants due to difficulty in obtaining blood sample and  
258 severity of shock while presentation, shorter duration of stay in the hospital. The time gap  
259 for the initiation of fluid after the patient diagnosed with shock was determined and the  
260 mean duration was  $24\pm 10$  minutes. This delay is significant for a shock patient which can  
261 contribute to morbidity and mortality, and it may be due to difficult of accessing  
262 intravenous line, patient overload, or delay in detecting shock. The frequency of re-  
263 evaluation particularly vital signs was determined, and the median was 1 hr. Patients were  
264 followed after admission and the median length of hospital stay was 7 days. Furthermore,  
265 this study showed statistically significant association between presence of underlying  
266 illness or chronic medical illness and mortality rate( $P<0.001$ ). In conclusion, the

267 prevalence of shock was comparable to other study, but the mortality rate was high where  
268 nearly half of the patients had died. Length of illness, type of shock, stage of shock,  
269 requirement of mechanical ventilation and duration of hospital stay were significantly  
270 associated with bad outcome of shock.

271

## 272 **Declarations**

273

## 274 **Acknowledgments**

275

276 The authors would like to acknowledge medical residents and internship team at Ayder  
277 Specialized Hospital, Department of Pediatrics and Child Health for their support in data  
278 collection during the study.

279

## 280 **Author Contributions**

281

282 **Conceptualization:** Mebrahtu G. Kidanu, Alemseged Birhane, Marta Yemane

283 **Data curation:** Mebrahtu G. Kidanu, Engdaeshet Tazebe

284 **Formal analysis:** Mebrahtu G. Kidanu, Engdaeshet Tazebe

285 **Investigation:** Mebrahtu G. Kidanu, Engdaeshet Tazebe

286 **Methodology:** Mebrahtu G. Kidanu, Engdaeshet Tazebe

287 **Project administration:** Mebrahtu G. Kidanu

288 **Software:** Mebrahtu G. Kidanu, Engdaeshet Tazebe

289 **Supervision:** Alemseged Birhane, Marta Yemane

290 **Validation:** Mebrahtu G. Kidanu, Engdaeshet Tazebe

291 **Visualization:** Mebrahtu G. Kidanu, Engdaeshet Tazebe

292 **Writing original draft:** Mebrahtu G. Kidanu, Mebrahtu G. Tedla

293 **Writing, review & editing:** Mebrahtu G. Tedla, Mebrahtu G. Kidanu, Mebrihit M.

294 Kahsay, Engdaeshet Tazebe, Alemseged Birhane, Marta Yemane

295 **Funding information**

296 None

297 **Data Availability statement**

298 All data related to this study are contained in this paper.

299 **Competing interests**

300 None

301

302

303

304

305

306

307

308

309 **References**

310

311

312 1.Robert M. Kliegman & Joseph W. St. Geme III. Nelson textbook of pediatrics,  
313 Philadelphia, Elsevier, 2020, 21<sup>st</sup> edition.

314

315 **2.** Karen Marcadante and Robert M. Kliegman. Nelson essentials of pediatrics,  
316 Philadelphia, Elsevier,2019,8<sup>th</sup> edition.

317  
318 **3.** Mark wattzman. Initial management of shock in children, up to date, 2018. Available at  
319 (<https://www.uptodate.com/contents/initial-management-of-shock-in-children>).

320  
321 **4.** Assies R, Snik I, Kumwenda M, Chimalizeni Y, Langton J, van Woensel JBM, Doctor  
322 A, Calis JCJ. Etiology, Pathophysiology and Mortality of Shock in Children in Low (Middle)  
323 Income Countries: A Systematic Review. J Trop Pediatr. 2022 Jun 6;68(4): fmac053. doi:  
324 10.1093/tropej/fmac053. PMID: 35796755; PMCID: PMC9586536.

325  
326 **5.** Abebe T, Girmay M, G/Michael G, Tesfaye M. The epidemiological profile of pediatric  
327 patients admitted to the general intensive care unit in an Ethiopian university hospital. Int  
328 J Gen Med. 2015, Jan 29;8:63-7. doi: 10.2147/IJGM.S76378. PMID: 25678810; PMCID:  
329 PMC4319554.

330  
331 **6.** Kurade A and Dhanawade S. Clinical profile and outcome of septic shock in children  
332 admitted to a tertiary care referral hospital, International Journal of Pediatric Research,  
333 April, 2016, Vol. 3. 2349-5499.

334  
335 **7.** Kannan KS. Study of prevalence, etiology, response to treatment and outcome of  
336 paediatric shock in a tertiary care hospital, International Journal of Contemporary  
337 Pediatrics, 2018, Vol. 5, pp. 1104-1108. 2349-3283. DOI:  
338 <http://dx.doi.org/10.18203/2349-3291.ijcp20181551>.

339  
340 **8.** Singh D, Chopra A, Pooni PA, Bhatia RC. A clinical profile of shock in children in  
341 Punjab, India. Indian Pediatr. 2006 Jul;43(7):619-23. PMID: 16891682.

342

343

344
